# Supplementary material for: Application of Multivariate Adaptive Regression Splines (MARSplines) for Predicting Antitumor Activity of Anthrapyrazole Derivatives
Source: MDPI journal article supplement (doi:10.3390/ijms23095132), 2022-05-04
Supplement: s1 [file s1]

**Table S1.** Values of experimental and predicted data of antitumor activity of anthrapyrazoles studied.

| Compound | Set      | pIC <sub>50</sub> exp | pIC <sub>50</sub> calc | Δ           |
|----------|----------|-----------------------|------------------------|-------------|
| a-01     | training | 5.65757732            | 5.61923018             | 0.03834714  |
| a-02     | test     | 5.82390874            | 5.92584593             | -0.10193719 |
| a-03     | test     | 6.14874165            | 6.12867153             | 0.02007012  |
| a-04     | training | 6.17392520            | 6.26342706             | -0.08950186 |
| a-07     | training | 5.74472749            | 5.73348332             | 0.01124417  |
| a-08     | training | 6.05551733            | 6.03384424             | 0.02167309  |
| a-14     | test     | 7.09691001            | 7.02934169             | 0.06756832  |
| a-15     | training | 6.13076828            | 6.11602433             | 0.01474395  |
| a-16     | test     | 6.12493874            | 6.16825123             | -0.04331249 |
| a-17     | training | 7.16115091            | 6.95374675             | 0.20740416  |
| a-18     | training | 7.13076828            | 7.13352053             | -0.00275225 |
| a-19     | training | 7.49485002            | 7.58204829             | -0.08719827 |
| a-20     | training | 7.22184875            | 7.08028247             | 0.14156628  |
| a-21     | training | 5.69897000            | 5.84378942             | -0.14481942 |
| a-23     | training | 7.33724217            | 7.42750735             | -0.09026518 |
| a-24     | training | 7.56863624            | 7.49905287             | 0.06958337  |
| a-25     | training | 7.49485002            | 7.49781744             | -0.00296742 |
| a-26     | test     | 6.40893539            | 6.42809260             | -0.01915721 |
| a-27     | training | 6.28399666            | 6.39974011             | -0.11574345 |
| a-28     | training | 6.20760831            | 6.21571588             | -0.00810757 |
| a-29     | training | 6.20065945            | 6.16049104             | 0.04016841  |
| a-30     | test     | 6.31875876            | 6.36746770             | -0.04870894 |
| a-31     | test     | 6.30103000            | 6.19624168             | 0.10478832  |
| a-32     | training | 6.40893539            | 6.46575983             | -0.05682444 |
| a-33     | training | 6.61978876            | 6.58053033             | 0.03925843  |
| a-34     | training | 6.82390874            | 6.85740690             | -0.03349816 |
| a-35     | training | 6.34678749            | 6.32453155             | 0.02225594  |
| a-36     | training | 6.06550155            | 5.90923681             | 0.15626474  |
| a-38     | training | 5.79588002            | 5.98801088             | -0.19213086 |
| a-40     | training | 6.31875876            | 6.28948074             | 0.02927802  |
| a-41     | training | 6.10790540            | 6.16470031             | -0.05679491 |
| a-42     | training | 7.82390874            | 7.83348736             | -0.00957862 |
| a-43     | training | 6.13667714            | 6.31466476             | -0.17798762 |
| a-44     | training | 5.95860731            | 6.14435413             | -0.18574682 |
| a-46     | training | 5.65757732            | 5.64271170             | 0.01486562  |
| a-47     | test     | 6.31875876            | 6.42366972             | -0.10491096 |
| a-48     | training | 6.50863831            | 6.44412269             | 0.06451562  |
| a-49     | test     | 6.15490196            | 6.52542500             | -0.37052304 |
| a-50     | training | 6.23657201            | 6.22192657             | 0.01464544  |
| a-51     | test     | 6.06048075            | 6.10308113             | -0.04260038 |
| a-52     | test     | 6.03151705            | 6.14501913             | -0.11350208 |
| a-53     | test     | 6.79588002            | 6.56103082             | 0.23484920  |
| a-54     | test     | 6.19382003            | 6.20542398             | -0.01160395 |
| a-55     | training | 6.35654732            | 6.15840229             | 0.19814503  |
| a-56     | training | 5.79588002            | 5.73407667             | 0.06180335  |
| a-57     | training | 6.01772877            | 6.04698435             | -0.02925558 |

|      |          |            |            |             |
|------|----------|------------|------------|-------------|
| a-60 | training | 6.85387196 | 6.95011544 | -0.09624348 |
| a-62 | training | 6.13076828 | 6.20181874 | -0.07105046 |
| a-63 | training | 5.74472749 | 5.70108400 | 0.04364349  |
| a-64 | test     | 6.36653154 | 6.36288473 | 0.00364681  |
| a-65 | training | 6.03621217 | 6.16734853 | -0.13113636 |
| a-66 | training | 6.63827216 | 6.61508816 | 0.02318400  |
| a-67 | training | 6.29242982 | 6.34395317 | -0.05152335 |
| a-68 | training | 6.18708664 | 6.07022871 | 0.11685793  |
| a-69 | training | 6.36653154 | 6.30977205 | 0.05675949  |
| a-70 | test     | 6.48148606 | 6.27034674 | 0.21113932  |
| a-71 | training | 6.11918641 | 6.11131309 | 0.00787332  |
| a-73 | training | 6.20065945 | 6.12736279 | 0.07329666  |
| a-74 | training | 5.74472749 | 5.69953786 | 0.04518963  |
| a-76 | training | 6.48148606 | 6.39179691 | 0.08968915  |
| a-77 | training | 6.65757732 | 6.72268102 | -0.06510370 |
| a-78 | training | 6.26760624 | 6.35376268 | -0.08615644 |
| a-79 | test     | 6.92081875 | 6.73720013 | 0.18361862  |
| a-80 | test     | 6.69897000 | 6.73603740 | -0.03706740 |
| a-81 | test     | 6.09691001 | 6.15268527 | -0.05577526 |
| a-82 | test     | 6.22914799 | 6.18301098 | 0.04613701  |
| a-83 | training | 7.33724217 | 7.36613703 | -0.02889486 |
| a-84 | test     | 5.13076828 | 5.09367634 | 0.03709194  |
| a-86 | training | 6.88605665 | 6.75542806 | 0.13062859  |
| a-87 | test     | 6.25963731 | 6.18253845 | 0.07709886  |
| a-88 | test     | 5.85387196 | 5.91001908 | -0.05614712 |
| a-90 | training | 6.07572071 | 6.03175652 | 0.04396419  |
| a-91 | training | 5.88605665 | 5.83038730 | 0.05566935  |

**Table S2.** Chemical structures of external set of anthrapyrazoles and antitumor activity against murine leukemia L1210 predicted by the optimal MARS model.

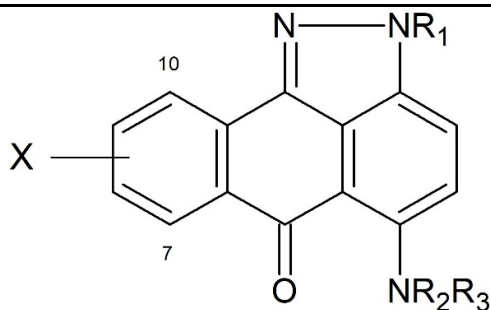

| Compound  | Set      | X                        | R <sub>1</sub>                                                                                     | NR <sub>2</sub> R <sub>3</sub>                                         | Predicted<br>L1210<br>Leukemia:<br>pIC <sub>50</sub> ,M |
|-----------|----------|--------------------------|----------------------------------------------------------------------------------------------------|------------------------------------------------------------------------|---------------------------------------------------------|
| pd112,600 | external | 7,10-(OH) <sub>2</sub>   | CH <sub>2</sub> CH(OH)CH <sub>2</sub> OH                                                           | NHCH <sub>2</sub> CH <sub>2</sub> NHCH <sub>2</sub> CH <sub>2</sub> OH | 5.24912034                                              |
| pd112,145 | external | 7,10-(OH) <sub>2</sub>   | CH <sub>2</sub> CH <sub>2</sub> NHCH <sub>2</sub> CH <sub>2</sub> N(CH <sub>3</sub> ) <sub>2</sub> | NHCH <sub>2</sub> CH <sub>2</sub> NHCH <sub>2</sub> CH <sub>2</sub> OH | 6.07466913                                              |
| pd113,785 | external | 7-OH                     | CH <sub>2</sub> CH <sub>2</sub> NHCH <sub>2</sub> CH <sub>2</sub> OH                               | NHCH <sub>2</sub> CH <sub>2</sub> NHCH <sub>2</sub> CH <sub>2</sub> OH | 8.44756776                                              |
| pd114,254 | external | 7,8,10-(OH) <sub>3</sub> | CH <sub>2</sub> CH <sub>2</sub> NHCH <sub>2</sub> CH <sub>2</sub> OH                               | NHCH <sub>2</sub> CH <sub>2</sub> NHCH <sub>2</sub> CH <sub>2</sub> OH | 5.68049669                                              |
| pd114,817 | external | 7-OH                     | CH <sub>2</sub> CH <sub>2</sub> NHCH <sub>2</sub> CH <sub>2</sub> OH                               | NHCH <sub>2</sub> CH <sub>2</sub> NHCH <sub>3</sub>                    | 8.29128247                                              |
| pd115,593 | external | 7,8,10-(OH) <sub>3</sub> | CH <sub>2</sub> CH <sub>2</sub> NHCH <sub>2</sub> CH <sub>2</sub> OH                               | NHCH <sub>2</sub> CH <sub>2</sub> NHCH <sub>3</sub>                    | 6.60859232                                              |
| pd116,522 | external | 7,10-(OH) <sub>2</sub>   | CH <sub>2</sub> CH <sub>2</sub> NHCH <sub>2</sub> CH <sub>2</sub> OH                               | NO <sub>2</sub>                                                        | 8.35698440                                              |
